# Supplementary material
Source: Springer Nature journal article supplement (https://www.springermedizin.de/resource/supplementary/13041_2008_6_MOESM5_ESM.pdf/25657362)

A

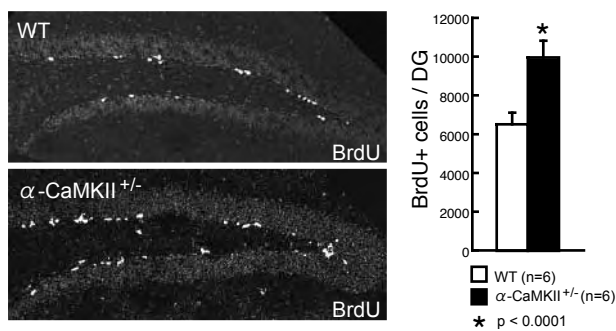

B

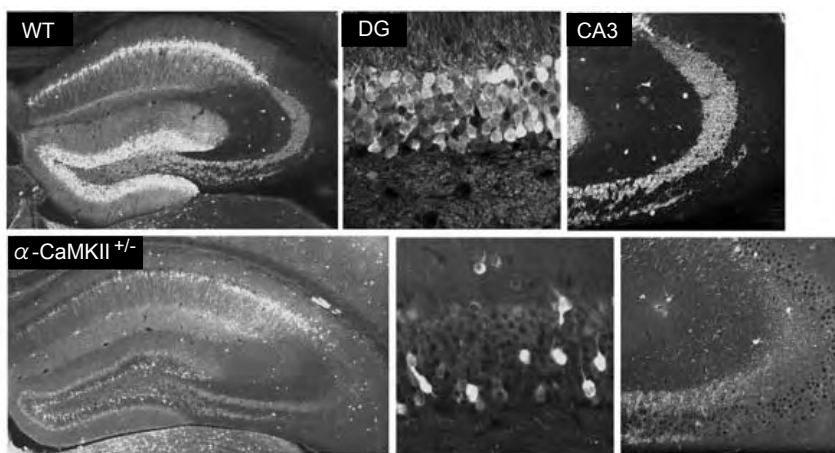

C

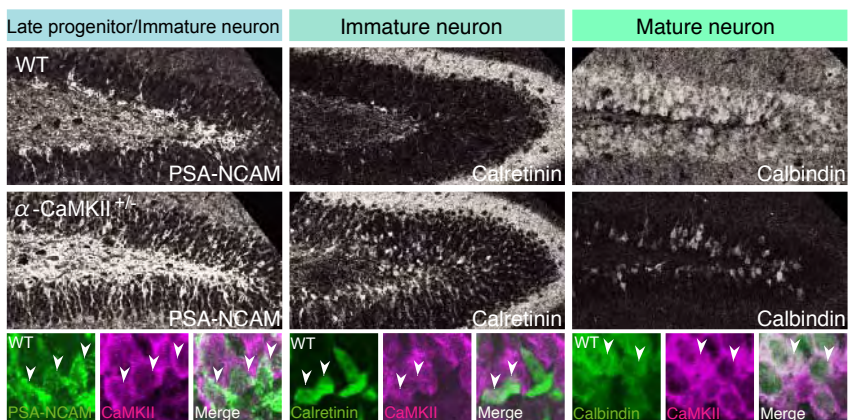

D

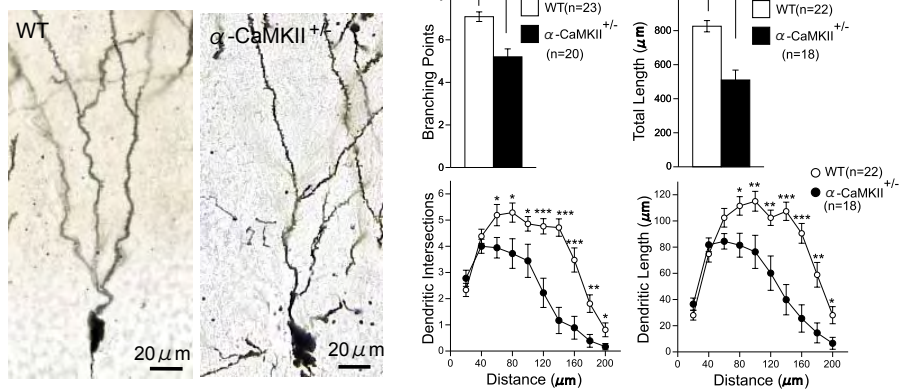

Supplement: MOESM5 [file 25657362]
